# Supplementary material for: Therapeutic potential of the human endogenous retroviral envelope protein HEMO: a pan‐cancer analysis
Source: PubMed Central journal article supplement (PMC8978518; doi:10.1002/1878-0261.13069), 2021-10-11
Supplement: MOL2-16-1451-s004.pdf [file MOL2-16-1451-s004.pdf]

**Table S8:** Mutational status of *CTNNB1* and *APC* in HEMO<sup>High</sup> and HEMO<sup>Low</sup> tumors of representative TCGA cohorts.

| Cohort           | <i>HEMO</i> subgroup |                        | <i>CTNNB1</i> |          | <i>APC</i> |         |
|------------------|----------------------|------------------------|---------------|----------|------------|---------|
|                  | Size                 | Expression level (TPM) | mut (%)       | p-value  | mut (%)    | p-value |
| HNSC             | High (49)            | > 12.2                 | 2             | 1.000    | 4          | 1.000   |
|                  | Low (49)             | < 1.1                  | 0             |          | 2          |         |
|                  | All (491)            |                        | 0.2           |          | 0.8        |         |
| RESPIRATORY LUAD | High (51)            | > 5.6                  | 3.9           | 0.4950   | 5.9        | 0.6175  |
|                  | Low (51)             | < 0.3                  | 0             |          | 2          |         |
|                  | All (511)            |                        | 2.3           |          | 1.8        |         |
| LUSC             | High (49)            | > 14.0                 | 0             | 1.000    | 2          | 1.000   |
|                  | Low (49)             | < 1.0                  | 0             |          | 0          |         |
|                  | All (490)            |                        | 0             |          | 1.6        |         |
| FEMALE BRCA      | High (111)           | > 6.7                  | 0             | 1.000    | 0          | 1.000   |
|                  | Low (111)            | < 0.5                  | 0             |          | 0          |         |
|                  | All (1086)           |                        | 0             |          | 0.3        |         |
| UCEC             | High (53)            | > 18.6                 | 73.6          | < 0.0001 | 5.7        | 0.7157  |
|                  | Low (53)             | < 0.7                  | 1.9           |          | 9.4        |         |
|                  | All (529)            |                        | 18.3          |          | 7.2        |         |
| CESC             | High (30)            | > 11.5                 | 10            | 0.2373   | 0          | 1.000   |
|                  | Low (30)             | < 0.6                  | 0             |          | 3.3        |         |
|                  | All (303)            |                        | 1.3           |          | 0.7        |         |
| DIGESTIVE COAD   | High (46)            | > 3.1                  | 4.3           | 1.000    | 67.4       | 0.0016  |
|                  | Low (46)             | < 0.06                 | 6.5           |          | 32.6       |         |
|                  | All (457)            |                        | 3.7           |          | 60.6       |         |
| URINARY BLCA     | High (41)            | > 8.4                  | 12.2          | 0.0549   | 0          | 1.000   |
|                  | Low (41)             | < 0.4                  | 0             |          | 2.5        |         |
|                  | All (410)            |                        | 2             |          | 2.4        |         |

Numbers of samples in each subgroup, corresponding to 90th (HEMO<sup>High</sup>) and 10th (HEMO<sup>Low</sup>) percentiles of the TCGA cohorts, are indicated in brackets with corresponding minimal and maximal *HEMO* expression level (TPM). Fischer's exact test. Gray line: size of the cohorts (All) is indicated, together with the global % of mutations of the two genes.
