# Supplementary material for: Therapeutic potential of the human endogenous retroviral envelope protein HEMO: a pan‐cancer analysis
Source: PubMed Central journal article supplement (PMC8978518; doi:10.1002/1878-0261.13069), 2021-10-11
Supplement: MOL2-16-1451-s007.pdf [file MOL2-16-1451-s007.pdf]

**Table S4:** Expression level of *HERV-env* genes in male breast tumor samples

| Male BRCA samples | Control      |              | TUMOR  |          |        |        |
|-------------------|--------------|--------------|--------|----------|--------|--------|
|                   | HEMO         | HEMO         | ERVW-1 | ERVFRD-1 | ERVV-2 | ERV3-1 |
| TCGA-AC-A62V      |              | <b>0,094</b> | 0,008  | 0,110    | 0,019  | 0,894  |
| TCGA-AQ-A54O      |              | <b>0,901</b> | 0,014  | 0,033    | 0,000  | 1,854  |
| TCGA-A8-A085      |              | <b>0,952</b> | 0,065  | 0,025    | 5,295  | 3,242  |
| TCGA-BH-A0B4      |              | <b>1,081</b> | 0,000  | 0,021    | 0,000  | 3,136  |
| TCGA-AO-A1KQ      |              | <b>1,738</b> | 0,031  | 0,089    | 1,014  | 2,456  |
| TCGA-A1-A0SM      |              | <b>1,788</b> | 0,053  | 0,050    | 1,467  | 3,381  |
| TCGA-AR-A1AV      |              | <b>2,017</b> | 0,214  | 0,049    | 0,044  | 5,540  |
| TCGA-D8-A1XS      |              | <b>2,172</b> | 0,145  | 0,105    | 0,019  | 3,292  |
| TCGA-EW-A1PD      |              | <b>2,374</b> | 0,115  | 0,123    | 0,063  | 4,111  |
| TCGA-BH-A0DD      | <b>0,127</b> | <b>2,617</b> | 0,035  | 0,038    | 0,000  | 3,803  |
| TCGA-E2-A14W      |              | <b>3,711</b> | 0,000  | 0,176    | 0,092  | 2,719  |
| TCGA-EW-A6SA      |              | <b>3,717</b> | 0,034  | 0,012    | 0,000  | 2,842  |

Expression level (as  $\log_2(\text{TPM}+1)$ ) of *HEMO* and 4 other *HERV-env* genes, in 12 male tumor samples included in the BRCA cohort (1086 total samples)
