# Supplementary material for: Therapeutic potential of the human endogenous retroviral envelope protein HEMO: a pan‐cancer analysis
Source: PubMed Central journal article supplement (PMC8978518; doi:10.1002/1878-0261.13069), 2021-10-11
Supplement: MOL2-16-1451-s008.pdf [file MOL2-16-1451-s008.pdf]

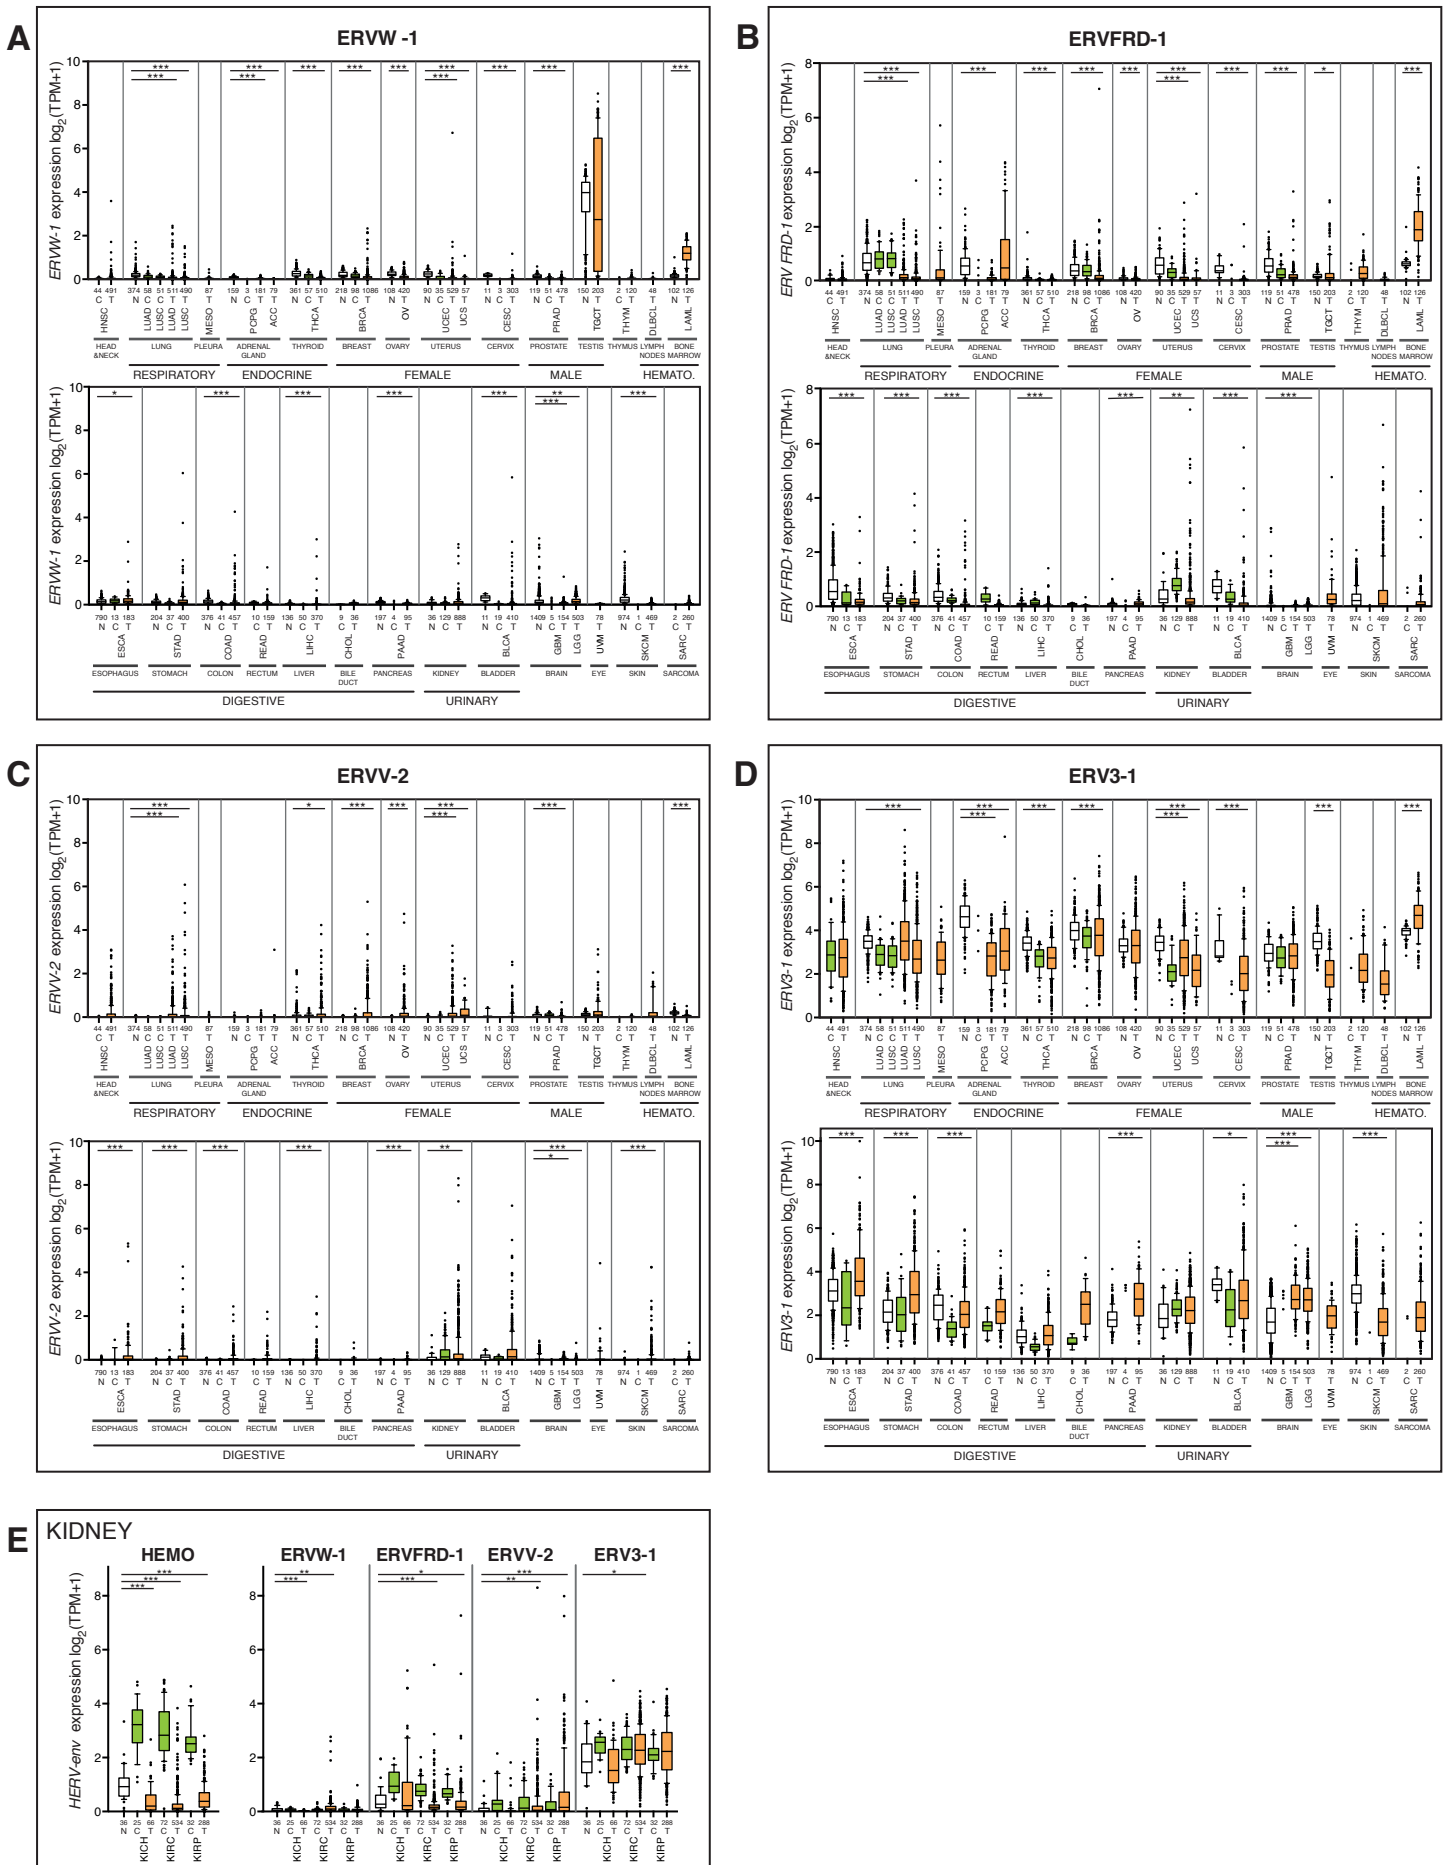

Fig. S1. Expression level of *HERV-env* genes in tumors of the TCGA cohorts.
