# Supplementary material for: Therapeutic potential of the human endogenous retroviral envelope protein HEMO: a pan‐cancer analysis
Source: PubMed Central journal article supplement (PMC8978518; doi:10.1002/1878-0261.13069), 2021-10-11
Supplement: MOL2-16-1451-s012.pdf [file MOL2-16-1451-s012.pdf]

**Table S3:** List and size of the cohorts investigated in this study from GTEx and TCGA databases

| SYSTEM        | ORGAN         | Acronym     | Size                                                    |                                                                                                                                 |                       | Pairwise comparison (p-value) for HEMO |                                              |                            | Pairwise comparison (p-value) N vs T for other HERV-env |                                       |                                      |                                        |                                      |
|---------------|---------------|-------------|---------------------------------------------------------|---------------------------------------------------------------------------------------------------------------------------------|-----------------------|----------------------------------------|----------------------------------------------|----------------------------|---------------------------------------------------------|---------------------------------------|--------------------------------------|----------------------------------------|--------------------------------------|
|               |               |             | N                                                       | C                                                                                                                               | T                     | N vs T                                 | C vs T                                       | N vs C                     | ERVW-1                                                  | ERVFRD-1                              | ERVV-2                               | ERV3-1                                 |                                      |
| RESPIRATORY   | HEAD & NECK   | GTEx        | na                                                      |                                                                                                                                 |                       |                                        |                                              |                            |                                                         |                                       |                                      |                                        |                                      |
|               |               | TCGA        | <b>HNSC</b>                                             | Head and Neck Squamous Cell Carcinoma                                                                                           | 44                    | 491                                    | na                                           | < 0.0001                   | na                                                      | na                                    | na                                   | na                                     | na                                   |
|               | LUNG          | GTEx        | 374                                                     |                                                                                                                                 |                       |                                        |                                              |                            |                                                         |                                       |                                      |                                        |                                      |
|               |               | TCGA        | <b>LUAD</b><br><b>LUSC</b>                              | Lung Adenocarcinoma<br>Lung Squamous Cell Carcinoma                                                                             | 58<br>51              | 511<br>490                             | < 0.0001<br>< 0.0001                         | 0.0736<br>< 0.0001         | 0.0322<br>0.6701                                        | < 0.0001<br>< 0.0001                  | < 0.0001<br>< 0.0001                 | < 0.0001<br>< 0.0001                   | 0.4803<br>< 0.0001                   |
| ENDOCRINE     | PLEURA        | GTEx        | na                                                      |                                                                                                                                 |                       |                                        |                                              |                            |                                                         |                                       |                                      |                                        |                                      |
|               |               | TCGA        | <b>MESO</b>                                             | Mesothelioma                                                                                                                    | na                    | 87                                     | na                                           | na                         | na                                                      | na                                    | na                                   | na                                     | na                                   |
| FEMALE        | ADRENAL GLAND | GTEx        | 159                                                     |                                                                                                                                 |                       |                                        |                                              |                            |                                                         |                                       |                                      |                                        |                                      |
|               |               | TCGA        | <b>PCPG</b><br><b>ACC</b>                               | Pheochromocytoma and Paraganglioma<br>Adrenocortical Carcinoma                                                                  | 3                     | 181<br>79                              | < 0.0001<br>0.0034                           | 0.0008<br>na               | 0.3753<br>na                                            | < 0.0001<br>< 0.0001                  | < 0.0001<br>0.7812                   | 0.6742<br>0.7382                       | < 0.0001<br>< 0.0001                 |
|               | THYROID       | GTEx        | 361                                                     |                                                                                                                                 |                       |                                        |                                              |                            |                                                         |                                       |                                      |                                        |                                      |
|               |               | TCGA        | <b>THCA</b>                                             | Thyroid Carcinoma                                                                                                               | 57                    | 510                                    | < 0.0001                                     | < 0.0001                   | 0.0002                                                  | < 0.0001                              | < 0.0001                             | 0.0346                                 | < 0.0001                             |
| MALE          | BREAST        | GTEx        | 218                                                     |                                                                                                                                 |                       |                                        |                                              |                            |                                                         |                                       |                                      |                                        |                                      |
|               |               | TCGA        | <b>BRCA</b>                                             | Breast Invasive Carcinoma                                                                                                       | 98                    | 1086                                   | < 0.0001                                     | 0.0017                     | < 0.0001                                                | < 0.0001                              | < 0.0001                             | < 0.0001                               | 0.001                                |
|               | OVARY         | GTEx        | 108                                                     |                                                                                                                                 |                       |                                        |                                              |                            |                                                         |                                       |                                      |                                        |                                      |
|               |               | TCGA        | <b>OV</b>                                               | Ovarian Serous Cystadenocarcinoma                                                                                               | na                    | 420                                    | 0.0393                                       | na                         | na                                                      | < 0.0001                              | 0.0003                               | < 0.0001                               | 0.3697                               |
|               | UTERUS        | GTEx        | 90                                                      |                                                                                                                                 |                       |                                        |                                              |                            |                                                         |                                       |                                      |                                        |                                      |
|               |               | TCGA        | <b>UCEC</b><br><b>UCS</b>                               | Uterine Corpus Endometrial Carcinoma<br>Uterine Carcinosarcoma                                                                  | 35                    | 529<br>57                              | < 0.0001<br>na                               | < 0.0001<br>na             | < 0.0001<br>na                                          | < 0.0001<br>< 0.0001                  | < 0.0001<br>< 0.0001                 | < 0.0001<br>< 0.0001                   | < 0.0001<br>< 0.0001                 |
| HEMATOLOGICAL | CERVIX        | GTEx        | 11                                                      |                                                                                                                                 |                       |                                        |                                              |                            |                                                         |                                       |                                      |                                        |                                      |
|               |               | TCGA        | <b>CESC</b>                                             | Cervical Squamous Cell Carcinoma                                                                                                | 3                     | 303                                    | < 0.0001                                     | 0.0010                     | 0.4835                                                  | < 0.0001                              | < 0.0001                             | 0.9601                                 | 0.0003                               |
|               | PROSTATE      | GTEx        | 119                                                     |                                                                                                                                 |                       |                                        |                                              |                            |                                                         |                                       |                                      |                                        |                                      |
|               |               | TCGA        | <b>PRAD</b>                                             | Prostate Adenocarcinoma                                                                                                         | 51                    | 478                                    | < 0.0001                                     | 0.0005                     | < 0.0001                                                | < 0.0001                              | < 0.0001                             | < 0.0001                               | 0.0553                               |
| DIGESTIVE     | TESTIS        | GTEx        | 150                                                     |                                                                                                                                 |                       |                                        |                                              |                            |                                                         |                                       |                                      |                                        |                                      |
|               |               | TCGA        | <b>TGCT</b>                                             | Testicular Germ Cell Tumors                                                                                                     | na                    | 203                                    | 0.0804                                       | na                         | na                                                      | 0.8722                                | 0.0159                               | 0.6814                                 | < 0.0001                             |
|               | THYMUS        | GTEx        | na                                                      |                                                                                                                                 |                       |                                        |                                              |                            |                                                         |                                       |                                      |                                        |                                      |
|               |               | TCGA        | <b>THYM</b>                                             | Thymoma                                                                                                                         | 2                     | 120                                    | na                                           | 0.0740                     | na                                                      | na                                    | na                                   | na                                     | na                                   |
| URINARY       | LYMPH NODES   | GTEx        | na                                                      |                                                                                                                                 |                       |                                        |                                              |                            |                                                         |                                       |                                      |                                        |                                      |
|               |               | TCGA        | <b>DLBCL</b>                                            | Diffuse Large B-cell Lymphoma                                                                                                   | na                    | 48                                     | na                                           | na                         | na                                                      | na                                    | na                                   | na                                     | na                                   |
|               | BONE MARROW   | GTEx        | 102                                                     |                                                                                                                                 |                       |                                        |                                              |                            |                                                         |                                       |                                      |                                        |                                      |
|               |               | TCGA        | <b>LAML</b>                                             | Acute Myeloid Leukemia                                                                                                          | na                    | 126                                    | < 0.0001                                     | na                         | na                                                      | < 0.0001                              | < 0.0001                             | < 0.0001                               | < 0.0001                             |
| NERVOUS       | ESOPHAGUS     | GTEx        | 790                                                     |                                                                                                                                 |                       |                                        |                                              |                            |                                                         |                                       |                                      |                                        |                                      |
|               |               | TCGA        | <b>ESCA</b>                                             | Esophageal Carcinoma                                                                                                            | 13                    | 183                                    | < 0.0001                                     | < 0.0001                   | 0.1542                                                  | 0.0109                                | < 0.0001                             | < 0.0001                               | < 0.0001                             |
|               | STOMACH       | GTEx        | 204                                                     |                                                                                                                                 |                       |                                        |                                              |                            |                                                         |                                       |                                      |                                        |                                      |
|               |               | TCGA        | <b>STAD</b>                                             | Stomach Adenocarcinoma                                                                                                          | 37                    | 400                                    | < 0.0001                                     | < 0.0001                   | 0.3745                                                  | 0.1253                                | < 0.0001                             | < 0.0001                               | < 0.0001                             |
|               | COLON         | GTEx        | 376                                                     |                                                                                                                                 |                       |                                        |                                              |                            |                                                         |                                       |                                      |                                        |                                      |
|               |               | TCGA        | <b>COAD</b>                                             | Colon Adenocarcinoma                                                                                                            | 41                    | 457                                    | < 0.0001                                     | < 0.0001                   | < 0.0001                                                | < 0.0001                              | < 0.0001                             | < 0.0001                               | < 0.0001                             |
|               | RECTUM        | GTEx        | na                                                      |                                                                                                                                 |                       |                                        |                                              |                            |                                                         |                                       |                                      |                                        |                                      |
|               |               | TCGA        | <b>READ</b>                                             | Rectum Adenocarcinoma                                                                                                           | 10                    | 159                                    | na                                           | < 0.0001                   | na                                                      | na                                    | na                                   | na                                     | na                                   |
|               | LIVER         | GTEx        | 136                                                     |                                                                                                                                 |                       |                                        |                                              |                            |                                                         |                                       |                                      |                                        |                                      |
|               |               | TCGA        | <b>LIHC</b>                                             | Liver Hepatocellular Carcinoma                                                                                                  | 50                    | 370                                    | < 0.0001                                     | 0.5852                     | 0.0012                                                  | < 0.0001                              | < 0.0001                             | 0.0003                                 | 0.5455                               |
|               | BILE DUCT     | GTEx        | na                                                      |                                                                                                                                 |                       |                                        |                                              |                            |                                                         |                                       |                                      |                                        |                                      |
|               |               | TCGA        | <b>CHOL</b>                                             | Cholangiocarcinoma                                                                                                              | 9                     | 36                                     | na                                           | < 0.0001                   | na                                                      | na                                    | na                                   | na                                     | na                                   |
| SKIN          | PANCREAS      | GTEx        | 197                                                     |                                                                                                                                 |                       |                                        |                                              |                            |                                                         |                                       |                                      |                                        |                                      |
|               |               | TCGA        | <b>PAAD</b>                                             | Pancreatic Adenocarcinoma                                                                                                       | 4                     | 95                                     | < 0.0001                                     | 0.7002                     | 0.0444                                                  | < 0.0001                              | < 0.0001                             | < 0.0001                               | < 0.0001                             |
|               | KIDNEY        | GTEx        | 36                                                      |                                                                                                                                 |                       |                                        |                                              |                            |                                                         |                                       |                                      |                                        |                                      |
|               |               | TCGA        | <b>All</b><br><b>KICH</b><br><b>KIRC</b><br><b>KIRP</b> | Kidney Renal Cell Carcinoma<br>Kidney Chromophobe<br>Kidney Renal Clear Cell Carcinoma<br>Kidney Renal Papillary Cell Carcinoma | 129<br>25<br>72<br>32 | 888<br>66<br>534<br>288                | < 0.0001<br>< 0.0001<br>< 0.0001<br>< 0.0001 | < 0.0001<br>na<br>na<br>na | < 0.0001<br>na<br>na<br>na                              | 0.2536<br>< 0.0001<br>0.001<br>0.2552 | 0.0019<br>0.9208<br>0.0002<br>0.0133 | 0.0044<br>0.0538<br>0.0084<br>< 0.0001 | 0.0591<br>0.0712<br>0.0155<br>0.0851 |
| EYE           | GTEx          | 11          |                                                         |                                                                                                                                 |                       |                                        |                                              |                            |                                                         |                                       |                                      |                                        |                                      |
|               | TCGA          | <b>BLCA</b> | Bladder Urothelial Carcinoma                            | 19                                                                                                                              | 410                   | < 0.0001                               | < 0.0001                                     | 0.4346                     | < 0.0001                                                | < 0.0001                              | 0.139                                | 0.0265                                 |                                      |
| SKIN          | BRAIN         | GTEx        | 1409                                                    |                                                                                                                                 |                       |                                        |                                              |                            |                                                         |                                       |                                      |                                        |                                      |
|               |               | TCGA        | <b>GBM</b><br><b>LGG</b>                                | Glioblastoma Multiforme<br>Brain Lower Grade Glioma                                                                             | 5                     | 154<br>503                             | < 0.0001<br>< 0.0001                         | 0.9278<br>na               | 0.0457<br>na                                            | < 0.0001<br>0.0049                    | 0.6475<br>< 0.0001                   | 0.0217<br>< 0.0001                     | < 0.0001<br>< 0.0001                 |
|               | SKIN          | GTEx        | 974                                                     |                                                                                                                                 |                       |                                        |                                              |                            |                                                         |                                       |                                      |                                        |                                      |
|               |               | TCGA        | <b>SKCM</b>                                             | Skin Cutaneous Melanoma                                                                                                         | 1                     | 469                                    | < 0.0001                                     | na                         | na                                                      | < 0.0001                              | 0.3519                               | < 0.0001                               | < 0.0001                             |
| SARCOMA       | GTEx          | na          |                                                         |                                                                                                                                 |                       |                                        |                                              |                            |                                                         |                                       |                                      |                                        |                                      |
|               | TCGA          | <b>SARC</b> | Sarcoma                                                 | 2                                                                                                                               | 260                   | na                                     | 0.7864                                       | na                         | na                                                      | na                                    | na                                   | na                                     |                                      |

N: Normal tissue samples from GTEx. C: Control (Normal Adjacent Tumor) tissue samples and T: Tumor tissue samples from TCGA. na: not applicable. P-values correspond to pairwise comparison between tumor (T), control (C) and normal (N) groups for HEMO and between tumor (T) and normal (N) for the 4 HERV-env genes (Mann-Whitney U-test). Cohorts are grouped according to body systems as in Fig. 1. BRCA: 1074 female and 12 male tumors samples, SKCM: 103 primary and 366 metastatic unpaired samples.
