# Supplementary material for: Therapeutic potential of the human endogenous retroviral envelope protein HEMO: a pan‐cancer analysis
Source: PubMed Central journal article supplement (PMC8978518; doi:10.1002/1878-0261.13069), 2021-10-11
Supplement: MOL2-16-1451-s013.pdf [file MOL2-16-1451-s013.pdf]

**A**

**REACTOME formation of the beta catenin TCF transactivating complex (n°25)**

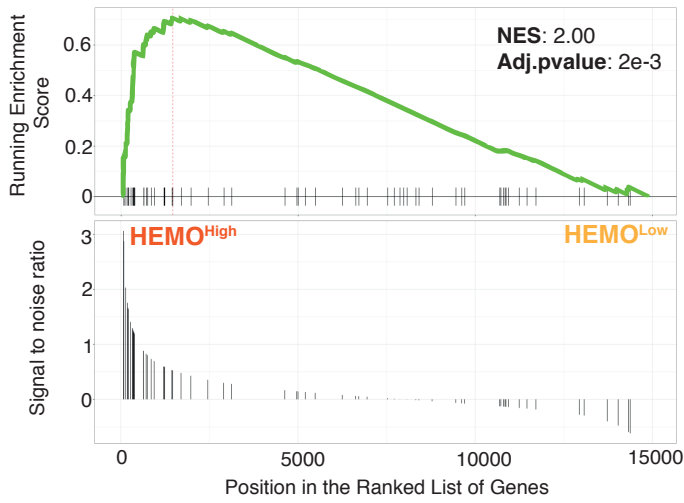

**REACTOME TCF dependent signaling in response to Wnt (n°71)**

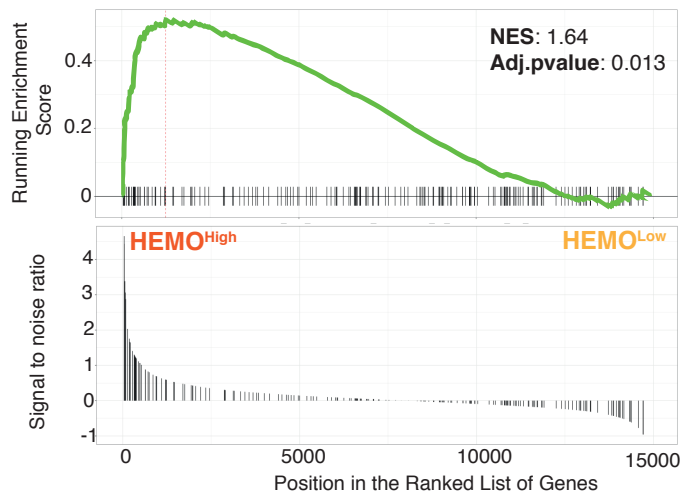

**B**

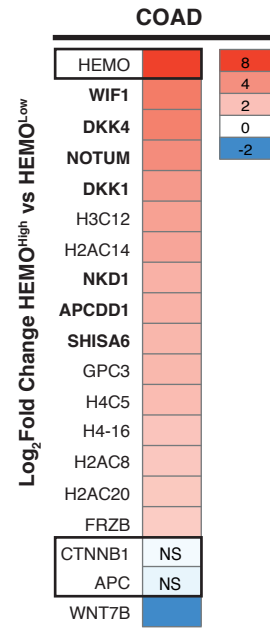

**Fig. S4.** HEMO upregulation is associated with active Wnt/ $\beta$ -catenin pathway in COAD cohort.
